# Supplementary material for: Pt-on-Pd bimetallic nanodendrites stereoassembled on MXene nanosheets for use as high-efficiency electrocatalysts toward the methanol oxidation reaction
Source: Royal Society of Chemistry journal article supplement (doi:10.1039/d1ta01784e), 2021-01-01
Supplement: d1ta01784e1.pdf [file d1ta01784e1.pdf]

Electronic Supplementary Material (ESI) for Journal of Materials Chemistry A. This journal is © The Royal Society of Chemistry 2021

Supporting Information for

**Pt-on-Pd bimetallic nanodendrites stereoassembled on MXene  
nanosheets for use as high-efficiency electrocatalysts toward the  
methanol oxidation reaction**

*Cuizhen Yang<sup>a</sup>, Quanguo Jiang<sup>a</sup>, Huan Liu<sup>a</sup>, Lu Yang<sup>a</sup>, Haiyan He<sup>a</sup>, Huajie Huang<sup>a,\*</sup>,  
and Weihua Li<sup>b,\*</sup>*

<sup>a</sup>College of Mechanics and Materials, Hohai University, Nanjing 210098, China

<sup>b</sup>College of Chemical Engineering and Technology, Sun Yat-sen University, Tangjiawan, Zhuhai, 519082, China

E-mail: huanghuajie@hhu.edu.cn or liweihua3@mail.sysu.edu.cn

**Supplementary Results**

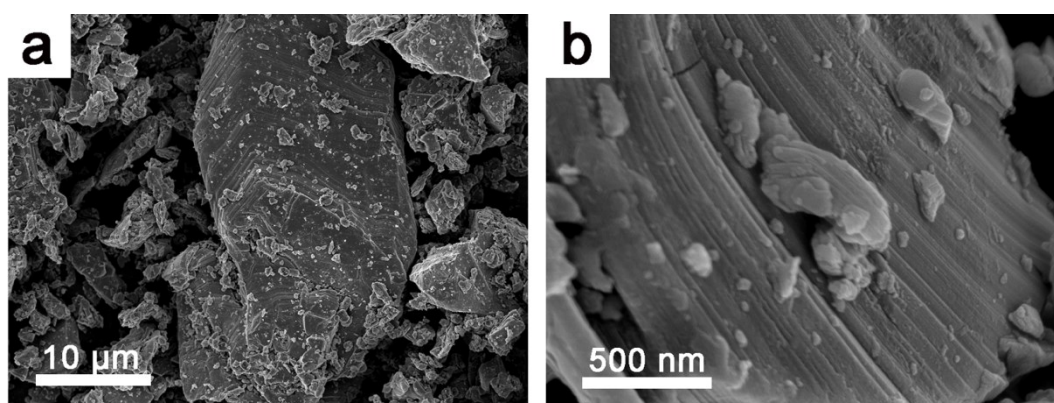

**Fig. S1** Representative SEM images of the bulk Ti<sub>3</sub>AlC<sub>2</sub> powder.

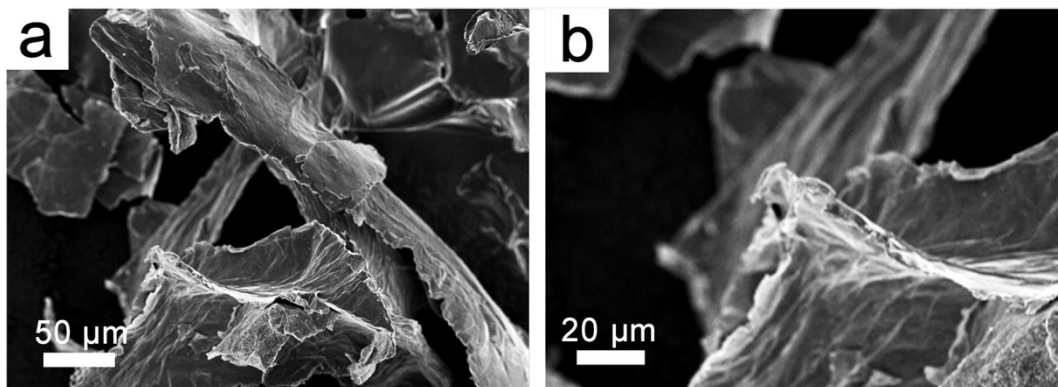

**Fig. S2** Representative SEM images of the exfoliated Ti<sub>3</sub>C<sub>2</sub>T<sub>x</sub> nanosheets.

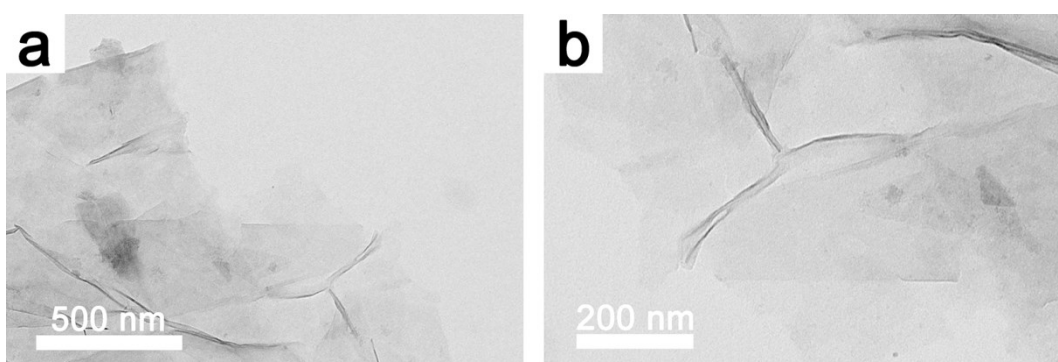

**Fig. S3** Representative TEM images of the exfoliated Ti<sub>3</sub>C<sub>2</sub>T<sub>x</sub> nanosheets.

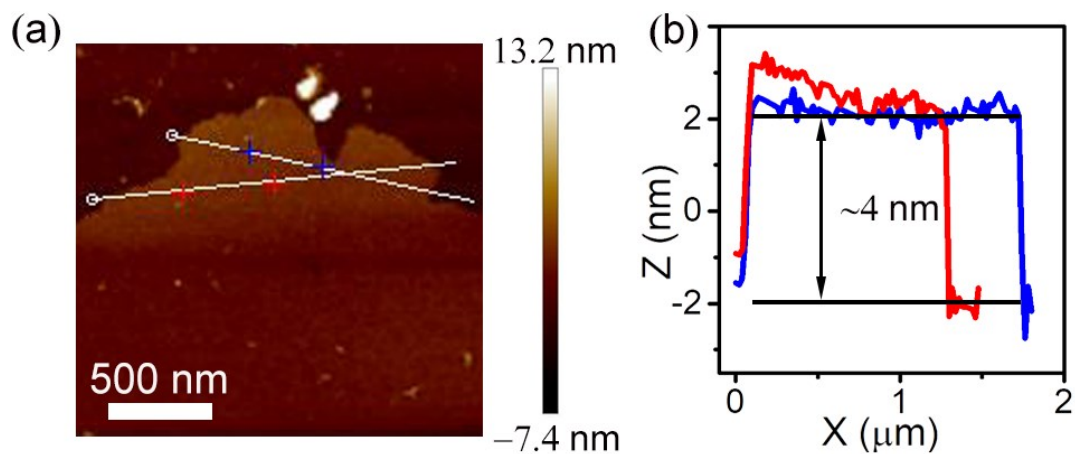

**Fig. S4** (a) AFM image of the exfoliated Ti<sub>3</sub>C<sub>2</sub>T<sub>x</sub> nanosheets and (b) the corresponding thickness analysis along the white lines in (a) discloses that the uniform thickness of the Ti<sub>3</sub>C<sub>2</sub>T<sub>x</sub> nanosheets is about 4.0 nm.

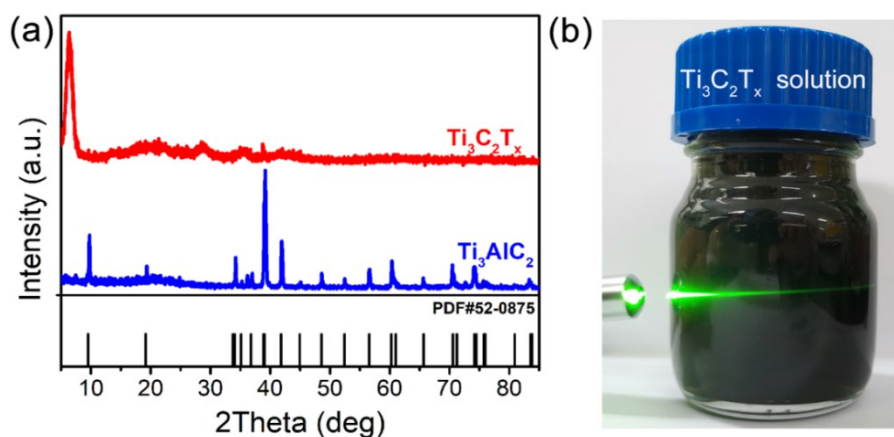

**Fig. S5** (a) The XRD patterns of the  $\text{Ti}_3\text{AlC}_2$  powder and  $\text{Ti}_3\text{C}_2\text{T}_x$  nanosheets; (b) The digital photographs of  $\text{Ti}_3\text{C}_2\text{T}_x$  solution showing the Tyndall scattering effect.

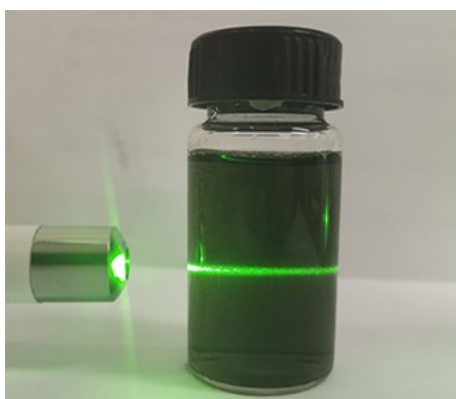

**Fig. S6** The Tyndall effect confirming the colloidal nature of the PVP-functionalized  $\text{Ti}_3\text{C}_2\text{T}_x$  solution.

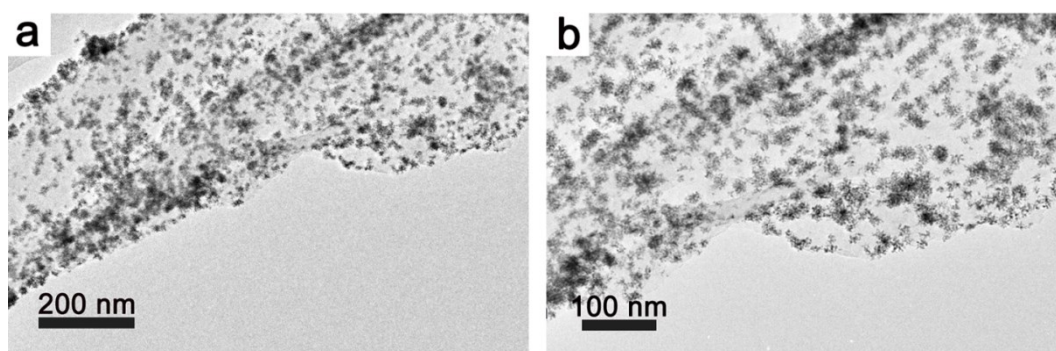

**Fig. S7** TEM images of the Pt-on-Pd/ $\text{Ti}_3\text{C}_2\text{T}_x$  hybrid with different magnifications, implying a uniform distribution of Pt-on-Pd nanoflowers on the  $\text{Ti}_3\text{C}_2\text{T}_x$  nanosheets.

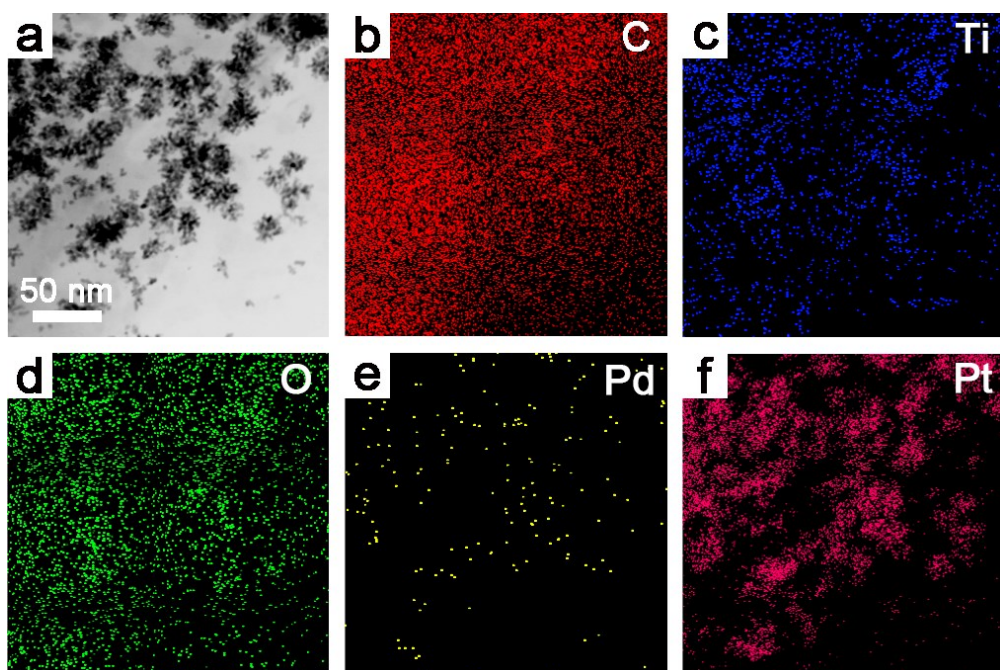

**Fig. S8** (a) TEM image of the Pt-on-Pd/Ti<sub>3</sub>C<sub>2</sub>T<sub>x</sub> hybrid and the corresponding elemental mapping images of (b) C, (c) Ti, (d) O, (e) Pd and (f) Pt elements.

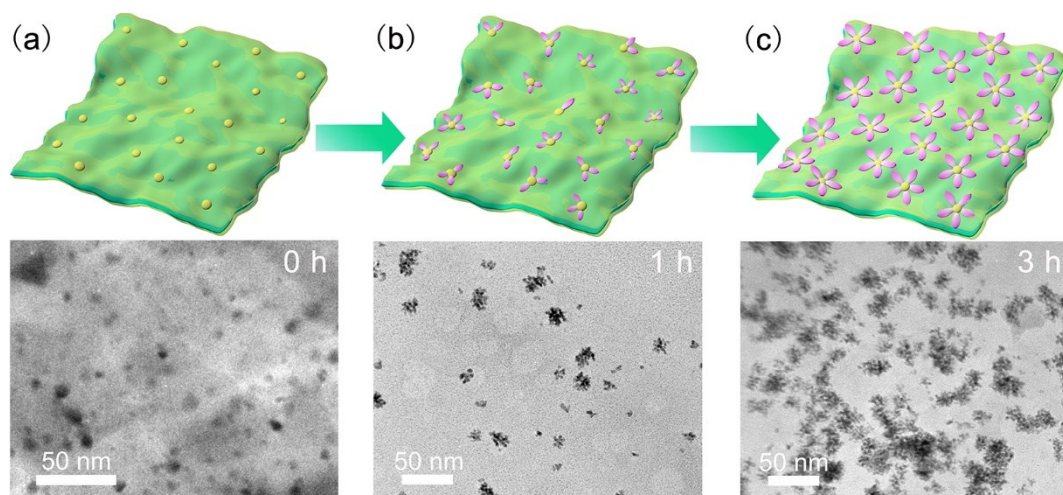

**Fig. S9** TEM images of intermediate products extracted from the reaction mixture of Pt-on-Pd bimetallic nanodendrite/Ti<sub>3</sub>C<sub>2</sub>T<sub>x</sub> hybrids at different reaction times : (a) 0 h; (b) 1 h; (c) 3 h.

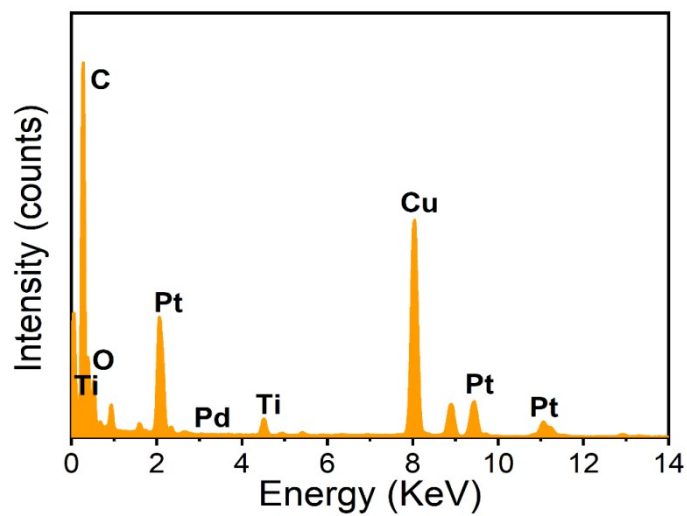

**Fig. S10** EDX spectrum of the Pt-on-Pd/Ti<sub>3</sub>C<sub>2</sub>T<sub>x</sub> samples confirms the co-existence of C, O, Ti, Pd and Pt components in the material. The Cu peaks were also observable because the sample was held on a Cu grid.

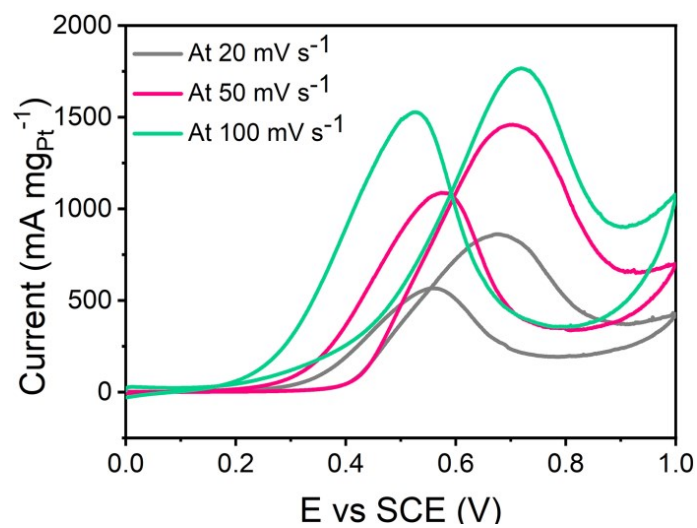

**Fig. S11** The CV curves of the Pt-on-Pd/Ti<sub>3</sub>C<sub>2</sub>T<sub>x</sub> catalyst with different scan rates.

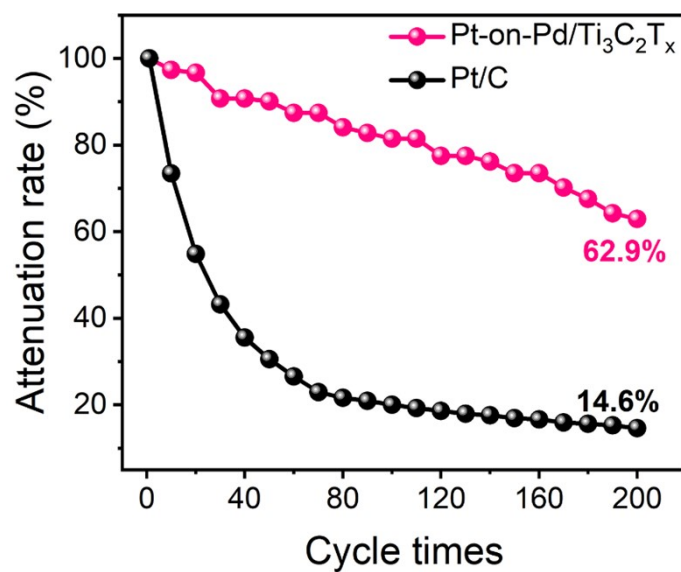

**Fig. S12** The stability behaviors of Pt-on-Pd/Ti<sub>3</sub>C<sub>2</sub>T<sub>x</sub> and Pt/C catalysts toward methanol oxidation, revealing the better cycling stability of Pt-on-Pd/Ti<sub>3</sub>C<sub>2</sub>T<sub>x</sub> catalysts.

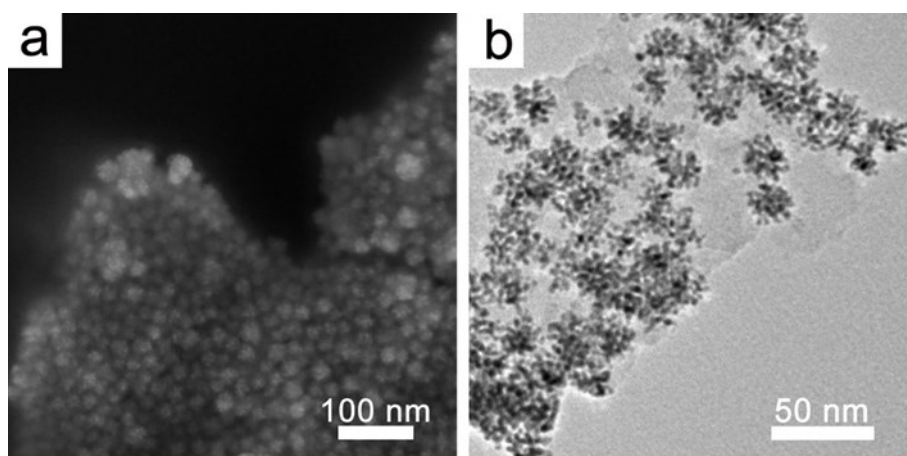

**Fig. S13** Typical (A) SEM and (B) TEM images of the Pt-on-Pd/Ti<sub>3</sub>C<sub>2</sub>T<sub>x</sub> nanoarchitecture after the long-term chronoamperometric test.

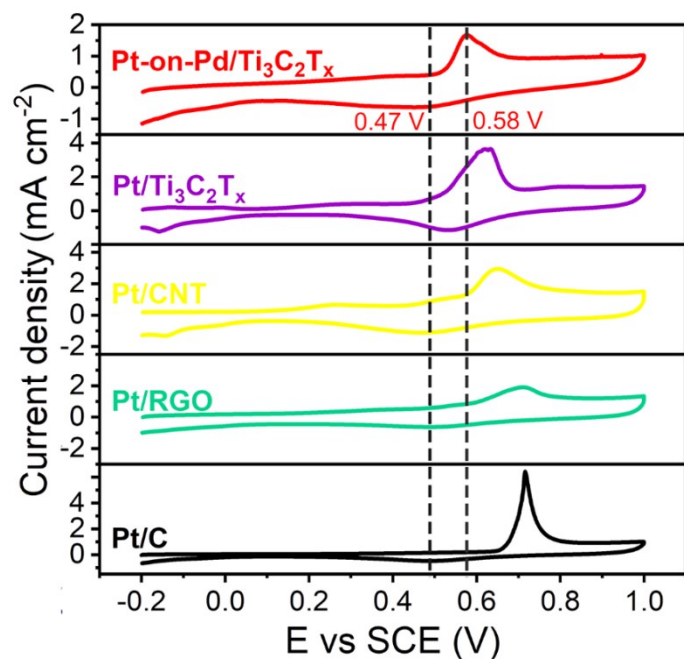

**Fig. S14** CO stripping voltammograms for the Pt-on-Pd/Ti<sub>3</sub>C<sub>2</sub>T<sub>x</sub> samples Pt/Ti<sub>3</sub>C<sub>2</sub>T<sub>x</sub>, Pt/CNT, Pt/RGO, and Pt/C catalysts tested in 0.5 M H<sub>2</sub>SO<sub>4</sub> solution.

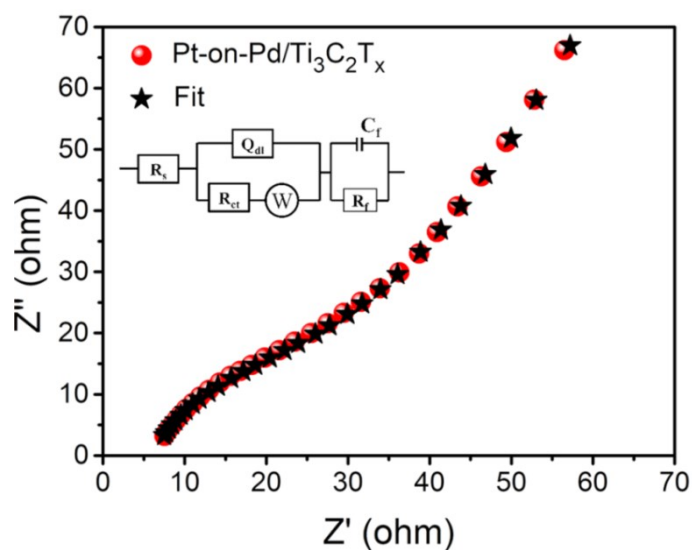

**Fig. S15** AC impedance spectrum of the Pt-on-Pd/Ti<sub>3</sub>C<sub>2</sub>T<sub>x</sub> electrode and the corresponding fitting curve. The inset is the equivalent circuit: R<sub>s</sub> and R<sub>ct</sub> represent the resistances for electrolyte and catalyst, respectively, Q<sub>dl</sub> is a constant phase element, W represents semiinfinite diffusion at the electrolyte/electrode interface, R<sub>f</sub> and C<sub>f</sub> are the resistance and capacitance for the Nafion-carbon film, respectively.

**Table S1.** Compiled study comparing ECSA and CV results for different catalysts.

| Electrode                                              | ECSA<br>(m <sup>2</sup> g <sup>-1</sup> ) | Mass activity<br>(mA mg <sup>-1</sup> ) | Specific activity<br>(mA cm <sup>-2</sup> ) |
|--------------------------------------------------------|-------------------------------------------|-----------------------------------------|---------------------------------------------|
| Pt-on-Pd/Ti <sub>3</sub> C <sub>2</sub> T <sub>x</sub> | 157.3                                     | 1461.7                                  | 0.93                                        |
| Pt-on-Pd/C                                             | 67.9                                      | 325.7                                   | 0.48                                        |
| Pt/Ti <sub>3</sub> C <sub>2</sub> T <sub>x</sub>       | 31.9                                      | 215.0                                   | 0.67                                        |
| Pt/RGO                                                 | 27.6                                      | 313.3                                   | 0.72                                        |
| Pt/CNT                                                 | 27.1                                      | 173.0                                   | 0.64                                        |
| Pt/C                                                   | 23.1                                      | 106.0                                   | 0.46                                        |

**Table S2.** Comparison of methanol oxidation behavior on the Pt-on-Pd/Ti<sub>3</sub>C<sub>2</sub>T<sub>x</sub> hybrids and various Pt-based electrocatalysts.

| Catalyst                                               | ECSA<br>(m <sup>2</sup> g <sup>-1</sup> ) | Mass activity<br>(mA mg <sup>-1</sup> ) | Scan rate<br>(mV s <sup>-1</sup> ) | Electrolyte                                                        | Ref.      |
|--------------------------------------------------------|-------------------------------------------|-----------------------------------------|------------------------------------|--------------------------------------------------------------------|-----------|
| Pt-on-Pd/Ti <sub>3</sub> C <sub>2</sub> T <sub>x</sub> | 157.3                                     | 1461.7                                  | 50                                 | 0.5 M H <sub>2</sub> SO <sub>4</sub> +<br>1 M CH <sub>3</sub> OH   | This work |
| AuPtCu nanowires                                       | N.A.                                      | ~500.0                                  | 50                                 | 0.1 M HClO <sub>4</sub> +<br>1 M CH <sub>3</sub> OH                | S1        |
| FePtPd nanowires                                       | N.A.                                      | 488.7                                   | 50                                 | 0.1 M HClO <sub>4</sub> +<br>0.2 M CH <sub>3</sub> OH              | S2        |
| PtPd/graphene                                          | 81.6                                      | 647.2                                   | 50                                 | 0.5 M H <sub>2</sub> SO <sub>4</sub> +<br>1 M CH <sub>3</sub> OH   | S3        |
| Pt/N-doped G                                           | N.A.                                      | ~400.0                                  | 200                                | 0.5 M H <sub>2</sub> SO <sub>4</sub><br>+1MCH <sub>3</sub> OH      | S4        |
| Pt/N-doped G<br>nanoribbon                             | 64.6                                      | ~390.0                                  | 20                                 | 1 M H <sub>2</sub> SO <sub>4</sub> +<br>2 M CH <sub>3</sub> OH     | S5        |
| Pt/imidazolium-salt<br>ionic liquid/CNT                | 67.6                                      | ~410.0                                  | 50                                 | 0.5 M H <sub>2</sub> SO <sub>4</sub> +<br>0.5 M H <sub>3</sub> OH  | S6        |
| Pt/[BMIM]BF <sub>4</sub> /CNT                          | N.A.                                      | 155.0                                   | 50                                 | 0.5 M H <sub>2</sub> SO <sub>4</sub> +<br>1 M CH <sub>3</sub> OH   | S7        |
| Pt/mesoporous carbon                                   | N.A.                                      | ~450                                    | 20                                 | 0.5 M H <sub>2</sub> SO <sub>4</sub> +<br>1 M CH <sub>3</sub> OH   | S8        |
| Pt/macroporous<br>carbon                               | N.A.                                      | 81.6                                    | 50                                 | 0.5 M H <sub>2</sub> SO <sub>4</sub> +<br>0.5 M CH <sub>3</sub> OH | S9        |
| Pt/3D MoS <sub>2</sub> -G                              | 62.3                                      | ~91.8                                   | 10                                 | 1 M H <sub>2</sub> SO <sub>4</sub> +<br>2 M CH <sub>3</sub> OH     | S10       |



## Reference

- [S1] W. Hong, J. Wang, E. Wang, *Small* 2014, **10**, 3262.
- [S2] S. Guo, S. Zhang, X. Sun, S. Sun, *J. Am. Chem. Soc.* 2011, **133**, 15354.
- [S3] Guo, S.; Dong, S.; Wang, E., *Acs Nano* 2010, **40**, 547.
- [S4] B. Xiong, Y. Zhou, Y. Zhao, J. Wang, X. Chen, R. O'Hayre, Z. Shao, *Carbon* 2013, **52**, 181.
- [S5] H. Huang, G. Ye, S. Yang, H. Fei, C. S. Tiwary, Y. Gong, R. Vajtai, J. M. Tour, X. Wang, P. M. Ajayan, *J. Mater. Chem. A* 2015, **3**, 19696.
- [S6] S. Guo, S. Dong, E. Wang, *Adv. Mater.* 2010, **22**, 1269.
- [S7] H. Chu, Y. Shen, L. Lin, X. Qin, G. Feng, Z. Lin, J. Wang, H. Liu, Y. Li, *Adv. Funct. Mater.* 2010, **20**, 3747.
- [S8] H. Jiang, T. Zhao, C. Li, J. Ma, *Chem Commun* 2011, **47**, 8590.
- [S9] X. Bo, L. Guo, *Electrochim. Acta* 2013, **90**, 283.
- [S10] Z. Gao, M. Li, J. Wang, J. Zhu, X. Zhao, H. Huang, J. Zhang, Y. Wu, Y. Fu, X. Wang, *Carbon* 2018, **139**, 369.
